# Supplementary material
Source: MDPI journal article supplement (https://www.mdpi.com/2409-515X/9/4/67)
Supplement: s1 [file s1]

Table S1. Overview of the different primers used for Sanger Sequencing.

| Disease (Gene) | Transcript  | Covering                 | Forward primer             | Reverse primer              | Primer designer |
|----------------|-------------|--------------------------|----------------------------|-----------------------------|-----------------|
| BKT (ACAT)     | NM_000019.3 | Exon 1                   | TGTGCTGGGTAGGCCTAAGGG      | ACCCGTCGCGTGACTGTCCT        | Variant_Seqr    |
|                | NM_000019.3 | Exon 2                   | ATGTGCCACAATGCTGGGCT       | CCTGCTTTGACTTTCACATGTATCCAA | Variant_Seqr    |
|                | NM_000019.3 | Exon 3                   | CCTCAAACCTCCTGTAGAGAACTGGG | CAAGGGAAAGCAGAAATGTAGGCA    | Variant_Seqr    |
|                | NM_000019.3 | Exon 4                   | GCAGGTCAGTAGTTACTTGCGTTT   | CCGGCCCCCTTTACACATTTTAAGT   | Variant_Seqr    |
|                | NM_000019.3 | Exon 5                   | TCTGCAGTTGTGTTTGAGTATCGGTT | TCAAATGGACTTAGCAAATCCAGACA  | Variant_Seqr    |
|                | NM_000019.3 | Exon 6                   | CATCAGGGTGAAGTGGTAAAGAGGG  | GCAGTTGCCAGCTAAGCGTCAG      | Variant_Seqr    |
|                | NM_000019.3 | Exon 7                   | CCACCACCTCCGGCCTAAGA       | TTCTTGAGGGCACTCCCGGT        | Variant_Seqr    |
|                | NM_000019.3 | Exon 8                   | GGGATGGTTAAGTGAAGCAGGG     | TCAATGCCAATGAAGACCCTATCA    | Variant_Seqr    |
|                | NM_000019.3 | Exon 9                   | AAACATTTAGCAGCCAGGCAA      | AGGCACATGCCACCATGCTC        | Variant_Seqr    |
|                | NM_000019.3 | Exon 10                  | TGGTGCCAATGTTCTAGAGGC      | CCAAGCTATCTCTGCTTTGGCA      | Variant_Seqr    |
|                | NM_000019.3 | Exon 11                  | TTCCATCTGAAACCAAGAACTTCCA  | TGCCTTATGAAAGATGGGTAGGAAGG  | Variant_Seqr    |
|                | NM_000019.3 | Exon 12                  | CCCTTCTGAAACAAGTCCTCCA     | GCTGACCCACAGTAGTCACACTGATT  | Variant_Seqr    |
| ADA (ADA)      | NM_000022.2 | Exon 1                   | GCCTAAGCCGAAGGAAGAACTCG    | CCGTAAAGAAAGAGCGTGGC        | In house design |
|                | NM_000022.2 | Exon 2                   | GCTTGATTCCACAGGGAGAC       | AACATTAAGCTCTGAAAGGTCCTTCG  | Primer Designer |
|                | NM_000022.2 | Exon 3                   | CTCCCATATTCTGCCATTTCTCTGT  | TGAGAGACGCCCATGTCTCCT       | Primer Designer |
|                | NM_000022.2 | Exon 4                   | CGGCAAAGGGAGGATGGGAAC      | TTGCCAGTGTCTGGGATCTTAT      | Primer Designer |
|                | NM_000022.2 | Exon 5                   | GGAGATCAGGTACAGCCCCACT     | GTGAACATCATGGCAGGCCCAA      | Primer Designer |
|                | NM_000022.2 | Exon 6                   | TAAGACCCAACAAAGACACACTTCA  | GAACTGAGCCCTGTTTTGTGCT      | Primer Designer |
|                | NM_000022.2 | Exon 7 and 8             | GCCCTGCTTTCTGCCTCTCTAT     | AGTGACAGCTACCACTTAGATAAGG   | Primer Designer |
|                | NM_000022.2 | Exon 8 and 9             | GATGCCCAATCCCTAAAGTTTCTTC  | AGTAGTAAAAGAGGTGAGGGCCTG    | Primer Designer |
|                | NM_000022.2 | Exon 10                  | CCTCTCTCCAAAGATTCCAGGC     | GGCTGCCATTCTGCCTGGTT        | Primer Designer |
|                | NM_000022.2 | Exon 11                  | CCAGAAACCAGGGAGTCATCAC     | GGTGTCTCTGGCCCCCTACAT       | Primer Designer |
|                | NM_000022.2 | Exon 12                  | TGTAAAAATGTTGCTCAGCCCCA    | GCCCCAGTGTGGCTTTCTGTG       | Primer Designer |
| BTD (BTD)      | NM_000060.3 | Exon 1                   | CGTCCACTTCCCGGGAGAG        | CAGTCCCGGCAGCCTTTG          | Variant_Seqr    |
|                | NM_000060.3 | Exon 2                   | CAAACCTTTTGAGCCGAGTATCAC   | CCTGGATGCTTTTTAGAGGGTGG     | Variant_Seqr    |
|                | NM_000060.3 | Exon 3                   | GCCTCTGGTTCTGCTACAGAGTAAC  | GGATTTTGGGGATGTTAAGGTCTCCT  | Variant_Seqr    |
|                | NM_000060.3 | Start exon 4 ( to AA280) | CACCGTGTTAGCCAGGGTG        | CTGCCAAGAGTGGGAGCTGG        | Variant_Seqr    |
|                | NM_000060.3 | Exon 4 (AA253 -> AA442)  | CTGCCATCAGAGTCCTCAGAGAC    | ACCCCCAGGGCATAACAGCTC       | Variant_Seqr    |
|                | NM_000060.3 | Exon 4 (AA417 -> end)    | CGTCTGTTCCAATGGCCTCTG      | CTTGTAGCCTGTGGAAGTGC        | Variant_Seqr    |

|               |             |                            |                         |                            |                 |
|---------------|-------------|----------------------------|-------------------------|----------------------------|-----------------|
| CPT1A (CPT1A) | NM_001876.4 | Exon 2                     | AACGCATGCCAAGTCCCTCC    | TGCCAGCTGTGGTGATGGAA       | Variant_Seqr    |
|               | NM_001876.4 | Exon 3                     | ATTGGCCAGGCTAAGGGCAC    | TCTCAGTGACGCACGCTGT        | Variant_Seqr    |
|               | NM_001876.4 | Exon 4                     | GCCATTCAAGGTTGAGGCC     | CCCTCTGACTTTCCCGGCTG       | Variant_Seqr    |
|               | NM_001876.4 | Exon 5                     | CTTGAGCCAAATGGCGGTGA    | TATTGGCATGGAGGGCAGGG       | Variant_Seqr    |
|               | NM_001876.4 | Exon 6                     | GCTGGTGTAACCTGCACTCAGGG | CCTAAGGCACAAGTGAGGCAACA    | Variant_Seqr    |
|               | NM_001876.4 | Exon 7                     | GTTCTCCGGCCTGGAAGCAG    | TCCCTGTTCTGGAATGGCCC       | Variant_Seqr    |
|               | NM_001876.4 | Exon 8                     | GATGATCCGCCTGCTTTGGC    | TGTTACGTGAGGGTATTTGGTGCAA  | Variant_Seqr    |
|               | NM_001876.4 | Exon 9                     | GCATAGGGATGAAAAGTGCCG   | TCAAACGAAGCAATTCGCACA      | Variant_Seqr    |
|               | NM_001876.4 | Exon 10                    | TCTTGAGACCTGCCAAGCCG    | GCCTGGAGAGACGCAGAGCA       | Variant_Seqr    |
|               | NM_001876.4 | Exon 11                    | GGTGAGTGTGAGGCACACAGGG  | AGCCTGCAATCTGGCCGTTT       | Variant_Seqr    |
|               | NM_001876.4 | Exon 12                    | AAATTGACTGTGGGGTTTGGA   | TTGTGTCTGGGACAGGGAAG       | Variant_Seqr    |
|               | NM_001876.4 | Exon 13                    | CCGAGGCAACAGGAGCTGTG    | GCCCTTAGCCCTCGTCTGTCC      | Variant_Seqr    |
|               | NM_001876.4 | Exon 14                    | TCTCTATGCCGGGTTTCGG     | CCTGCTCATGTCAGACCCGC       | Variant_Seqr    |
|               | NM_001876.4 | Exon 15                    | TGGCACATTACCGTCTGGGC    | TGCTGCCACGTCACTACCCA       | Variant_Seqr    |
| CTD (SLC22A5) |             | (Missing AA 623->625)      |                         |                            |                 |
|               | NM_001876.4 | Exon 16                    | GCAGTACTAAACGCGCTGCTCA  | CAAACCTCATTCTGGAAAGGCTGTCA | Variant_Seqr    |
|               | NM_001876.4 | Exon 17                    | TACGGCGGTAGAACC GCAAG   | CAGATACGCTGCCCAAGCCA       | Variant_Seqr    |
|               | NM_001876.4 | Exon 18                    | TCCCGAAATCAAGTAAAGCAGGC | ATGGATGTCTTGCCAGTCTT       | Variant_Seqr    |
|               | NM_001876.4 | Exon 19                    | AAATCCAAGCCGATGCGGAG    | CGACAACACACCCGCACAAA       | Variant_Seqr    |
|               | NM_003060.4 | Exon 1 (start-> AA125)     | CCTCCGCGGACGGTCTTG      | AGGTAGACGTCTGACTGAACT      | Primer designer |
|               | NM_003060.4 | Exon 1 (AA88-> end Exon 1) | ACCATCGCCAACTTCTCGG     | CAAGTCCTGGCTCTGCTACTTACC   | Primer Designer |
|               | NM_003060.4 | Exon 2                     | TGGCAGGATGTTCTGACTTC    | ACTACCAACTGAAATCAAGGG      | Primer Designer |
|               | NM_003060.4 | Exon 3                     | GGATCTTGAGAAAGCCCCACTT  | GTAATAAGACCAAGGAGCCACAG    | Primer Designer |
|               | NM_003060.4 | Exon 4                     | ACTGCTAACTCGACCTCCC     | AATCATCCTGCCAGTGGGCA       | [30]            |
|               | NM_003060.4 | Exon 5                     | CTATGGCTGTGCTCTACCTG    | CTCAAATCACGGTCAGTCTG       | [30]            |
|               | NM_003060.4 | Exon 6                     | CTGAGTCTCTGACCACCTC     | TTGTCTGGAAGCCTCAGGCA       | [30]            |
|               | NM_003060.4 | Exon 7                     | TGGGAAAGATGTGGATACTGC   | GAGACAGCCTGGTAGACAG        | [30]            |
|               | NM_003060.4 | Exon 8                     | TCAATAGCTGCATGCCATGG    | GCTCACATTCAAGCCAGTTAG      | [30]            |
|               | NM_003060.4 | Exon 9                     | GCATAAAGGGGTAGATGAGAG   | TATTGTGAGGGGCTCCTGAG       | [30]            |
| GA1 (GCDH)    | NM_003060.4 | Exon 10                    | AGGATTCTCTTCCAGGGAAG    | GCAAGACAGTCTTCTCTTCAG      | [30]            |
|               | NM_000159.3 | Exon 1, 2 and 3            | AAAGGCAGAGCTGCGGAGGG    | CCTCTGACCCTGGCCACGAC       | Variant_Seqr    |
|               | NM_000159.3 | Exon 4 and 5               | GGGTAGGGCTGATGAGGGTCC   | ATACAGAGGGTCTGCAGTGTGT     | Primer Designer |
|               | NM_000159.3 | Exon 6                     | CAGCTAGGGCCAGCTTGGTG    | TCCAGGTGAAGCCAGGGTC        | Variant_Seqr    |
|               | NM_000159.3 | Exon 7 and 8               | GGGATGTATCAGGGACCAGGCA  | CACGGAGCCTGCCTGACAAA       | Variant_Seqr    |

|                   |             |                |                             |                            |                 |
|-------------------|-------------|----------------|-----------------------------|----------------------------|-----------------|
| HCY (CBS)         | NM_000159.3 | Exon 9         | TTTCCTGCTTCAGAGTTGGTT       | GGAGTCACCCATGGTATAGAGAGT   | Primer Designer |
|                   | NM_000159.3 | Exon 10        | CCCACCAGGCCTGAGTTCCT        | CATCCCGATGCTCCAAGCAA       | Variant_Seqr    |
|                   | NM_000159.3 | Exon 11        | CCTGAACCTTCTGCTGTCCCTC      | TCCCGAGCATGTGGGAGAAA       | Variant_Seqr    |
|                   | NM_000159.3 | Exon 12        | TCAGCATTACCATCTCTGTTGGTC    | CCTCACTCTGCTCCAACACCCA     | Variant_Seqr    |
|                   | NM_000071.2 | Exon 3         | TCATCTACACGGCATGGCCC        | TCTGAGGGAGCAGAGCACGC       | Variant_Seqr    |
|                   | NM_000071.2 | Exon 4         | CACACCCTCGCTGCTTCCAC        | CCAGTTCTTCGAGTGTGATTTGTGT  | Variant_Seqr    |
|                   | NM_000071.2 | Exon 5         | GTGCAAGATGCCAGGGAGCA        | TGCCCAGGTGCAGGTGTAGG       | Variant_Seqr    |
|                   | NM_000071.2 | Exon 6 and 7   | GAATGCCTGTCTCCAGGCC         | GCAGAAGCAGCCATGTTGGG       | Variant_Seqr    |
|                   | NM_000071.2 | Exon 7 and 8   | CAGCCATGCCCTGTGTTTGC        | AGGTGCAGGCCACCGCTTT        | Variant_Seqr    |
|                   | NM_000071.2 | Exon 9         | AGCTCCTTCGGGTACAGAGC        | CAGACCAAGGGCAGCAACGA       | Variant_Seqr    |
|                   | NM_000071.2 | Exon 10        | CTTGGTGAGGTCAGGCCACG        | TTGGAGCCTGGGTTCTTGGG       | Variant_Seqr    |
|                   | NM_000071.2 | Exon 11        | GTGGCTGACTGAGGGTGCG         | GAGCAGGGAAAACGTGTGAAAATT   | Primer Designer |
|                   | NM_000071.2 | Exon 12        | CGGTTCTCAGGTGAGGCGTG        | GCTCAGGGCCAGGAGGTTTG       | Variant_Seqr    |
|                   | NM_000071.2 | Exon 13        | TGACAGGCCAGCTCCTGAA         | TGAGCGATGGCTGTGTGCAT       | Variant_Seqr    |
|                   | NM_000071.2 | Exon 14        | ATGGCTGCCCTGTCCAGTGA        | CCTGAGCGACAGGTGGATGC       | Variant_Seqr    |
|                   | NM_000071.2 | Exon 15        | CGCGCACCCGCTTGA             | AGAGGACTTCCATGTGTGGC       | Variant_Seqr    |
| IVA (IVD)         | NM_000071.2 | Exon 16        | CTGCATGCTGGACAAAGGGC        | GGCTTTGCAGGACCCACCAT       | Variant_Seqr    |
|                   | NM_000071.2 | Exon 17        | GAGACGGATGCTCTGTGCCG        | CTGGGCTCCAGCCACCCT         | Variant_Seqr    |
|                   | NM_002225.3 | Exon 1         | CGCAGTTAGGGGCTGCTATT        | CTTCACTCCACAGACGTGAG       | Variant_Seqr    |
|                   | NM_002225.3 | Exon 2 and 3   | TCTGAGGAGGCATAAACTACTGAGGC  | CAATCTTTCCTTCCCTTCTGTC     | Variant_Seqr    |
|                   | NM_002225.3 | Exon 4         | GCAGGTCTGTGGCATCAGCTT       | TGTTCAATGCAAGAGTTCTGGTCC   | Variant_Seqr    |
|                   | NM_002225.3 | Exon 5         | TCAGCCTGTAGCCATTGGGC        | CCACAATGAAGGCTGTGATGCC     | Variant_Seqr    |
|                   | NM_002225.3 | Exon 6         | CTGGCCATGAGTGAGCCAA         | TGACCCATCTGCCCTGGACTT      | Variant_Seqr    |
|                   | NM_002225.3 | Exon 7         | GGCGTTAGCACCGGAAGGTC        | TGCGGAGTGTGTGATGCCAG       | Variant_Seqr    |
|                   | NM_002225.3 | Exon 8         | GCCTTTGTGGTTGGCCTCGT        | AGAGCAGGGCCAAGAGGCAG       | Variant_Seqr    |
|                   | NM_002225.3 | Exon 9         | ACGACACCTGGGCTGTCAG         | CCAGCAGCTTCTTCGGACCA       | Variant_Seqr    |
|                   | NM_002225.3 | Exon 10 and 11 | CCATCATCCTGAGTAAATCCCATCT   | GAAACTGCTTTCTGAAGCAGCCA    | Variant_Seqr    |
|                   | NM_002225.3 | Exon 12        | TGTGGCCTGTTTCTATATACTTGGCAT | GCAAGGGCACAGAGTCACCAA      | Primer Designer |
| LCHADD<br>(HADHA) | NM_000182.4 | Exon 1         | ACAGAGGGCTGCGTCTCCG         | CCGTCTCACCTTGGCTGACG       | Primer Designer |
|                   | NM_000182.4 | Exon 2 and 3   | CATGTAAGATTACTGCCAGATTGGT   | TCTGACCTAACTGAAATGGAAAA    | Primer Designer |
|                   | NM_000182.4 | Exon 4         | TGTGTCACTGTGCCAGCACTT       | TGGGCCAAAGCTGCCTGAAT       | Variant_Seqr    |
|                   | NM_000182.4 | Exon 5         | CAGCTGATGAATGCCACCAATG      | TGCTGCTATTGTGCTATTTGAAGCAA | Variant_Seqr    |
|                   | NM_000182.4 | Exon 6         | TCGCTTGAACCTGGGAGGAGA       | AATGCCAGCCTAAGGAATTTAGTTT  | Variant_Seqr    |
|                   | NM_000182.4 | Exon 7         | TGAGCTTCTCTGTGCTTCTGTG      | CCCTATATTCTATCCTTGCTTGCC   | Variant_Seqr    |
|                   | NM_000182.4 | Exon 8         | TGTTAAAGCTGGGCCTTGGGT       | TTGCCACCTACCAGTCTCCAGTC    | Variant_Seqr    |
|                   | NM_000182.4 | Exon 9         | CAGCTTGCTATGCCCTTCCCT       | ACCCAAGGCCAGCTTTAACA       | Variant_Seqr    |
|                   | NM_000182.4 | Exon 10        | GGGTATTCTTAGCATCCACTTGCTCA  | TCAGTCGAGAGCAGCCAGATCC     | Variant_Seqr    |

|              |             |                |                               |                             |                 |
|--------------|-------------|----------------|-------------------------------|-----------------------------|-----------------|
| TFP (HADHB)  | NM_000182.4 | Exon 11        | GGGCTCAAATGTGCTCAGGAAA        | CAGACTTCTGCAGCACTGAACCC     | Variant_Seqr    |
|              | NM_000182.4 | Exon 12        | TCCGCAGGCCTGATACGAAA          | TGTGCCTGCATTAGTTGGTTTATTGA  | Variant_Seqr    |
|              | NM_000182.4 | Exon 13        | GCAATCATGAGTTTCTATAGCTCCTT    | TTGGGCATTTGGAGGCATTCTA      |                 |
|              | NM_000182.4 | Exon 14        | TTAGGAACCACCCGCATCCA          | GAGGAGGTGACACCCATGCTG       | Variant_Seqr    |
|              | NM_000182.4 | Exon 15        | CTGGGATGGCTGGGAGAACC          | CCCATGGAACCAAACCACTCA       | Variant_Seqr    |
|              | NM_000182.4 | Exon 16        | GCAGAGAGAGGGCACCAGGG          | GCAGGGTTCTCCAGCCATC         | Variant_Seqr    |
|              | NM_000182.4 | Exon 17        | CGCCAGTGATAAGGGCTCTGTG        | GTCCTGGGCCTGGTCAGGTG        | Variant_Seqr    |
|              | NM_000182.4 | Exon 18        | TGGGAAGCTTTGGGCTGTCA          | TCAGGAATTCAGAAGAGGCCAGA     | Variant_Seqr    |
|              | NM_000182.4 | Exon 19        | CAGCTAGCAGCTGGCATGGG          | TCTCTGAGGGCCAGCACCAA        | Variant_Seqr    |
|              | NM_000182.4 | Exon 20        | GGCGTTTAAACCAGAAGGGCA         | AGCCCGTGTGTGCGTCTCCTT       | Variant_Seqr    |
|              | NM_000183.2 | Exon 2 and 3   | GCCATGGATGAGGTTATCAGAGTTCA    | TCCAGCAGGTTCAAATCCCAGA      | Variant_Seqr    |
|              | NM_000183.2 | Exon 4         | TAGCTGGGCATGATGGCAGG          | TGTTGGAAGCAAGCTATCTGGACC    | Variant_Seqr    |
|              | NM_000183.2 | Exon 5         | TGAAATGATGGACTGCCTTGA         | GGCTGATCAATCGAGTCCTGTGG     | Variant_Seqr    |
|              | NM_000183.2 | Exon 6         | TGAGAAGGTGCCAAATGCTTGTC       | CAAGAGACAATGTCCTAAACCAGCTCA | Variant_Seqr    |
|              | NM_000183.2 | Exon 7         | TCTGCACTAGAAACCAGCCAGCA       | GCGAGATCCCGTCTCCACAA        | Variant_Seqr    |
|              | NM_000183.2 | Exon 8         | CGTCCATATGGCAGGAATGAAAC       | AGAGGATCTCTAAAGAGGGCTCACAAA | Variant_Seqr    |
|              | NM_000183.2 | Exon 9         | TGGCAGTGTGGACTCTGCTATGC       | GGCTGAATACTTTGGAAACAGAACCA  | Variant_Seqr    |
|              | NM_000183.2 | Exon 10        | TAAGGCTTGTGGTTCCATAGAGTTAAAAA | CCCTCTATTCATAACACACAAAAAGTT | Primer Designer |
|              | NM_000183.2 | Exon 11 and 12 | GCCTTCTCTACCCTCATCTCCA        | CACATAAACCAATTATGAACTCAGGGC | Variant_Seqr    |
|              | NM_000183.2 | Exon 13        | TGTTCCGTTCCCTCACAAAGGC        | CCCTCCCAGCAGTGTGAATCAG      | Variant_Seqr    |
|              | NM_000183.2 | Exon 14        | GAAAGCGTAGAGGAACATGAATAACGA   | AGGAGGCAATCCAACCTGGC        | Variant_Seqr    |
| MCAD (ACADM) | NM_000183.2 | Exon 15        | TGTTCTTGCATTCTGACATTAGATGA    | TGGAGGGTCTATGACACCACTG      | Variant_Seqr    |
|              | NM_000016.4 | Exon 1         | AGCCCAACCGCCTCTTCCC           | CCCCTAAGCAACGTGGAAACG       |                 |
|              | NM_000016.4 | Exon 2         | CAAACCAGTTGCTGTACTCACT        | TTGTGGCATTTCAGATATGTAAGTTGA | Primer Designer |
|              | NM_000016.4 | Exon 3 and 4   | ATGCACTGTAGTCTGAGTTTCTGAT     | GCAGGAAGACAAAGGTAGAAAGTC    | Primer Designer |
|              | NM_000016.4 | Exon 5         | TGTGCCAGCCAGAACACATGTAGA      | GTGGCAGCAAACCATCCCAA        | Variant_Seqr    |
|              | NM_000016.4 | Exon 6         | GCAAGGTATAGGCCAGTTCTTTGGA     | TTGGCATCCTTGACACATCATTG     | Variant_Seqr    |
|              | NM_000016.4 | Exon 7         | ACAATCCTGTTTCCAAACAGTCAAA     | CAGGCACTATACCAAAGGTTCTC     | Primer Designer |
|              | NM_000016.4 | Exon 8         | TGCGGGTAACTGAAACCACAGA        | AGCCTTCTCCACAGGTTGGTACTACTC | Variant_Seqr    |
|              | NM_000016.4 | Exon 9         | CAGGCATTGCAGACTACAGTTTGTTG    | AGCTGGGCAGAGTGGTGTGC        | Variant_Seqr    |
|              | NM_000016.4 | Exon 10        | TTACGTGCCTATTCCCTGTTCCC       | TGCATAGCACAGTGTGAGGTTTCTGAG | Variant_Seqr    |
| PKU (PAH)    | NM_000016.4 | Exon 11        | TGCTTGAGGCCAGGAGTTGC          | TGAATATTCTCTCTCTTGGAAACCAA  | Variant_Seqr    |
|              | NM_000016.4 | Exon 12        | TCAGGTTTTGGAATCTGTAGAGGC      | CTTTCTAAGCCCACTTTTCTGTCA    | Variant_Seqr    |
|              | NM_000277.1 | Exon 1         | GCAATGGTCATTTCCTGTGAA         | CAGCGAAGTGGTGCCTCCTG        | Variant_Seqr    |
|              | NM_000277.1 | Exon 2         | TCATCACAAAGTTCCTGTTGAACTGA    | TCATTGATCATTTAATTGCCCTGGA   | Variant_Seqr    |
|              | NM_000277.1 | Exon 3         | CCAGGCACTTGCCTAGGTCCC         | TCTGCATCTTTGGCCTGCGT        | Variant_Seqr    |
|              | NM_000277.1 | Exon 4         | TCCCAGCCCTCGTGTAATAGGA        | GACGGGTGGGAGGGAGATGA        | Variant_Seqr    |
|              |             |                |                               |                             |                 |

|                    |             |                 |                           |                             |                 |
|--------------------|-------------|-----------------|---------------------------|-----------------------------|-----------------|
| TYR (FAH)          | NM_000277.1 | Exon 5          | AGCTTGGGAGAGAGCAGGGC      | GCAAGGAGGCTCATGCTAAATCA     | Variant_Seqr    |
|                    | NM_000277.1 | Exon 6          | TGGAGGGAAGGCAGAGCACA      | CCAAATCACCTTTTCATGTGGG      | Variant_Seqr    |
|                    | NM_000277.1 | Exon 7          | GCTTGCTGCCACTTGTTC        | TCCACTACCTAAAGGTCTCCTAGTGCC | Variant_Seqr    |
|                    | NM_000277.1 | Exon 8          | TCCTGCATGGGAATCAGGGA      | TGTGCCCTACCCTGCACCTG        | Variant_Seqr    |
|                    | NM_000277.1 | Exon 9          | TTGTGCAAATGTAACCCACCACA   | TCAGGGTCTATGTGGGCTGTTCTG    | Variant_Seqr    |
|                    | NM_000277.1 | Exon 10         | GCCTTGGAATCAGGAGGCC       | TCCATCTGGGATTCCAGCCC        | Variant_Seqr    |
|                    | NM_000277.1 | Exon 11         | GCAAAGGTCAGCATGCCCAA      | TGGTTGGCTCCCACGTCATC        | Variant_Seqr    |
|                    | NM_000277.1 | Exon 12         | GGATGGAGAGGCGAGGGAGA      | CCTCAGCCCTGGCTGTTGAA        | Variant_Seqr    |
|                    | NM_000277.1 | Exon 13         | GCTTGAATGAAGCAGGTCCCAA    | TCCCTGGGAAGTGACCTATGGA      | Variant_Seqr    |
|                    | NM_000137.2 | Exon 1          | GGGTCCCTGCTGTGTACCC       | TGGGCGAGAGAAACACACCG        | Variant_Seqr    |
|                    | NM_000137.2 | Exon 2          | CGCTCTGCATACAGGGCCAC      | CCCAAGGCCACCTCCTACCA        | Variant_Seqr    |
|                    | NM_000137.2 | Exon 3          | TGGCCACCTTCAACTGTGGG      | AAGGCTGCCAAGCCGTGACT        | Variant_Seqr    |
|                    | NM_000137.2 | Exon 4          | CCAGCCAGAAGGTGCCACT       | ATTGTGCTGTGCAGGGAGCCA       | Variant_Seqr    |
|                    | NM_000137.2 | Exon 5          | TGCATTTGGTGCTGCCATTG      | GGACTTGCCCTTCGATCCCA        | Variant_Seqr    |
| VLCADD<br>(ACADVL) | NM_000137.2 | Exon 6 and 7    | TGAGCCATGTGTATGTGGCGA     | GCTGCCGATGTGGCTGAAGA        | Variant_Seqr    |
|                    | NM_000137.2 | Exon 8          | AGTGGATTCATGCCAGGCC       | GTCAGCCGTGTCCCTAGCCA        | Variant_Seqr    |
|                    | NM_000137.2 | Exon 9          | GCACAGTGCCCTCAAAGGACC     | GCCAGGGAAACCACAAGGGA        | Variant_Seqr    |
|                    | NM_000137.2 | Exon 10         | CCATCTCGGCCTGTCTGCTG      | GCCACACACATCTCCAGGGC        | Variant_Seqr    |
|                    | NM_000137.2 | Exon 11         | GGTCACAAGTAGCTTTCAAATGGCA | CATGGAAGCTCCAGGCCCA         | Variant_Seqr    |
|                    | NM_000137.2 | Exon 12         | GGACTGGAGAGAGCTGGCTGG     | CACGTGTCACTGCGCTGCTC        | Variant_Seqr    |
|                    | NM_000137.2 | Exon 13         | TCGGGACTCCCAGGTCTTGC      | GTCTGCACAGGGCGTTTGCT        | Variant_Seqr    |
|                    | NM_000137.2 | Exon 14         | AAGGGCTCCTGCGTGCAACT      | CCAGGAGGCCTGGGATGTCT        | Variant_Seqr    |
|                    | NM_000018.3 | Exon 1 and 2    | GTGCACTGTGGACGATGAGTCAG   | GAAGCGGTGACCTTTCCCCTAGT     | Primer Designer |
|                    | NM_000018.3 | Exon 3, 4 and 5 | GGGAAAGGTCACCGCTTCGC      | CCAAGCCCCGAGTCATTCCTTA      | Primer Designer |
|                    | NM_000018.3 | Exon 5 and 6    | CCGGTAAGGGAAGGGATAATCAGA  | GGCAGGTGCTTAGAAGAGACCTT     | Primer Designer |
|                    | NM_000018.3 | Exon 7          | TAGGTCAGGAAGTGCCTGT       | TGGCCTAATCTGTGCCAAGC        | Primer Designer |
|                    | NM_000018.3 | Exon 8 and 9    | GAAGTGGATACTCCCAGGTGTT    | TAAGTCCCCCAACCCAAATTCA      | Primer Designer |
|                    | NM_000018.3 | Exon 9          | CTGCTCCCATTCTCCCCCTTCTC   | CAGGGAGGAATGACGACCACTA      | Primer Designer |
|                    | NM_000018.3 | Exon 10         | ATAAGGAGCGAAGGAGCAGTT     | TTCTGCAGTCTCCCTAGGAGAGG     | Primer Designer |
|                    | NM_000018.3 | Exon 11         | TTGTATGCAAAACCATCCCTCT    | GTTGTAGTCTGACCCGACTGG       | Primer Designer |
|                    | NM_000018.3 | Exon 12 and 13  | CTTATCTTGAGATCTGGGTGATGA  | GAGCCACAAACAGCCGAAGAAT      | Primer Designer |
|                    | NM_000018.3 | Exon 14 and 15  | TACAGGACGGTCTTCTGCAGAG    | CTCAACTCCGGGTGGACAAGT       | Primer Designer |
|                    | NM_000018.3 | Exon 16 and 17  | AACAGCTGAGGCGGTAGGCTTA    | CTGCCTCCTCACCTCGAGAGAA      | Primer Designer |
|                    | NM_000018.3 | Exon 18 and 19  | TCAGTAAGTGAGCTCTACACCATT  | AGGCCTTGGAGATGCTTTGAAGTT    | Primer Designer |
|                    | NM_000018.3 | Exon 19 and 20  | CAGGCAGGGAATGCCTGAGC      | AGGCACAGTGCTGGGAACACTA      | Primer Designer |

Abbreviations: BKT: Beta-ketothiolase deficiency, ADA: Adenosine deaminase deficiency, BTD: Biotinidase deficiency, CACT: Carnitine-acylcarnitine translocase deficiency, CPT1A: Carnitine palmitoyl transferase 1 deficiency, CPT2: Carnitine palmitoyltransferase 2 deficiency, CTD: Carnitine transporter deficiency, GA1: Glutaric aciduria type 1, HCY: Cystathionine  $\beta$ -synthase deficiency, IVA: Isovaleric acidaemia, LCHADD: Long-chain acyl-CoA dehydrogenase deficiency, TFP:Trifunctional protein deficiency, MCADD: Medium-chain acyl-CoA dehydrogenase deficiency, PKU: Phenylketonuria, TYR: Tyrosinemia type, VLCADD: Very long-chain acyl-CoA dehydrogenase deficiency. AA: Amino Acid.

All primer sequences are designed to include the canonical splice sites. For most amplicons a minimum of +/- 5 base pairs from exon start/stop are covered. In some instances, primer design with these parameters could not be accomplish this due to difficult areas in the intronic areas 5' and/or 3' of the exons, which in the worst cases resulted in some amino acids being omitted (listed in the table as missing AA's). For ETFB: exon 2 +/- 4 bp included.[30] Wang, Y., Kelly M. A., Cowan T. M., and Longo N. A missense mutation in the OCTN2 gene associated with residual carnitine transport activity. *Human Mutation*, **2000**. 15, 238-245.

Table S2. Overview of the primer-pairs used for confirmation of diseases mainly sequenced using AmpliSeq panels.

| Gene               | Transcript  | Covering                        | Forward primer             | Reverse primer              | Primer design   |
|--------------------|-------------|---------------------------------|----------------------------|-----------------------------|-----------------|
| CACT<br>(SLC25A20) | NM_000387.5 | Exon 1                          | TGGCGCAGGGTCAGAAGAGA       | GCTTTGCGCTCTGCCACG          | Variant_Seqr    |
|                    | NM_000387.5 | Exon 2                          | GTGAAGGAGCGGCAGCTGTG       | TCCAGCAGGTTAAGTGAATGCCA     | Variant_Seqr    |
|                    | NM_000387.5 | Exon 3                          | TATTTTAACCCATGTCACGCTACCA  | CCTTCAGTTTCTCCAGCATAATAGG   | Primer designer |
|                    | NM_000387.5 | Exon 4                          | GGGTGAAAGGACATAAACATGCACA  | TGTGGCCAGACTCCCATTGC        | Variant_Seqr    |
|                    | NM_000387.5 | Exon 5                          | CCCTGCAGACACCTGGGAAA       | CCTGCTGGGTCTGTGACTCTGA      | Variant_Seqr    |
|                    | NM_000387.5 | Exon 6                          | GTGCTGCTGGCACTCCTTGG       | TTGAACCAAATCTGGTCACCCA      | Variant_Seqr    |
|                    | NM_000387.5 | Exon 7                          | TGGGACAAATGCACAAATGCC      | CTCCAAGGAGTGCCAGCAGC        | Variant_Seqr    |
|                    | NM_000387.5 | Exon 8                          | TGCCCACCTCTAATGGCCAGG      | GGCATTGTGCATTTGTCCCA        | Variant_Seqr    |
|                    | NM_000387.5 | Exon 9                          | TCAGCTCCTGGTGATCTGGTTGA    | TTGATGTGGAGTGGGTGTGGG       | Variant_Seqr    |
| CPT2 (CPT2)        | NM_000098.2 | Exon 1                          | CAACTCCAGTTTCTGTCTTGCTCCA  | GGGCGGAAACGGGTCTACTA        | Variant_Seqr    |
|                    | NM_000098.2 | Exon 2                          | CCATTGATTCTGATTTGTGAGTCGC  | GGTTCCTGGAGACCCAGCCA        | Variant_Seqr    |
|                    | NM_000098.2 | Exon 3                          | TCTCCATGCCAACTGCCTCC       | GGCTGGCCATCATTCTTGAGC       | Variant_Seqr    |
|                    | NM_000098.2 | Start exon 4 -><br>AA266        | CAGGGAATTCTTCTCTCTGGAGGTTG | GGGCTCACAATGTTCCCATCTTG     | Variant_Seqr    |
|                    | NM_000098.2 | Exon 4 (AA203 -><br>AA400)      | GGGCCTACCTGGTCAATGCG       | TCTGTGGAGTGACGGCAGGG        | Variant_Seqr    |
|                    | NM_000098.2 | Exon 4 (AA410 -><br>AA526)      | AAAGTGGAAGTCTGGCAGTGTCTG   | AAAGGCCTCAGAGCACCTCTTTG     | Variant_Seqr    |
|                    | NM_000098.2 | Exon 4 (AA410 -><br>end Exon 4) | CACGGTGCAGAACTCAACTTCG     | TGTGGCTGTTCAGACTGCTAGGG     | Variant_Seqr    |
|                    | NM_000098.2 | Start Exon 5 -><br>AA627        | TGCTCTGAAGGTTAGTCAGTTGGTGG | GGAAGAGACATTGCAGCCTATCCA    | Variant_Seqr    |
|                    | NM_000098.2 | Exon 5 (AA557 -><br>end Exon 5) | GTTTGCTCTGCGGCATCTGG       | TTCATGATGAGGAAGTGATGGTAGC   | Variant_Seqr    |
| GA2 (ETFA)         | NM_000126.4 | Exon 1                          | AGTGATCTTTGCAAGACCCCATAG   | TTACCCCGAGGTCAGCTCAGT       | Primer Designer |
|                    | NM_000126.4 | Exon 2                          | AAGCATAATTCTCTGTTGCCATCT   | GTGGTACAGTGATAGACACAAATAGC  | Primer Designer |
|                    | NM_000126.4 | Exon 3 and 4                    | AAATCCAGATTGGCTACATAAACAGT | TAATTCTTAAGTGGCCCTTTTGCT    | Primer Designer |
|                    | NM_000126.4 | Exon 5                          | TGGTCCACTTAAAGCAATTGTATGG  | TCCACAAGTGTACACTTGGTA       | Primer Designer |
|                    | NM_000126.4 | Exon 6                          | TGTAGGCAGAGGTCATCTCTTATT   | TGGAGAAGGAAGCTTTGTTTCATATTC | Primer Designer |
|                    | NM_000126.4 | Exon 7                          | CCCAAACCTCCCACTTCTTACAT    | TGGAGGGTGTACACTTTAACATAT    | Primer Designer |
|                    | NM_000126.4 | Exon 8                          | GAGGCCTTCTCTCACTGAATGC     | GGAGGTGACATGCTTAATATGGCAGT  | Primer Designer |
|                    | NM_000126.4 | Exon 9                          | GCTGGATTAAAGAACTGCTGGGC    | GCATGCAGAAGAGTTAAGCCCAA     | Primer Designer |
|                    | NM_000126.4 | Exon 10                         | CCCAGATCTACGTTAGTGTGAATGGC | CAGCATGTATGGGTTGTGCAGTG     | Primer Designer |

|             |             |                               |                                   |                                  |                 |
|-------------|-------------|-------------------------------|-----------------------------------|----------------------------------|-----------------|
| GA2 (ETFB)  | NM_000126.4 | Exon 11                       | CAAACACAGACACACAAACACACAATG       | GCACTACAAAGGCTGTGGATTTGG         | Primer Designer |
|             | NM_000126.4 | Exon 12                       | GGTTGATTAGGCTGGTGGAGACA           | GCCCTCGTGCCTCAACAGTG             | Primer Designer |
|             | NM_001985.3 | Exon 1                        | TTACGAGAAGACCCCCACCCA             | GAAGTGTTTATAGGACCGGGAGGAT        | Primer Designer |
|             | NM_001985.3 | Exon 2                        | CCCCCTCCCCAAGACCTTCA              | ACCTCTCACTGTGGGTACCATAAAT        | Primer Designer |
|             | NM_001985.3 | Exon 3                        | GACTCTGTCTCCCTGCTCAAAC            | CCTGAGGATAGCAGCCAAGTCA           | Primer Designer |
|             | NM_001985.3 | Exon 4                        | CCCAGCCTGCATTTCTATTGGA            | CCCTGTTCTAGACAGAGGCCTGAA         | Primer Designer |
| GA2 (ETFDH) | NM_001985.3 | Exon 5                        | GACCTCCTTTGGATCCTTCCCTCC          | CTCACTGGCAGCATCAGGACATG          | Primer Designer |
|             | NM_001985.3 | Exon 6                        | ACAGAGATAGATGTTGAGAGTCAGTTTTATTG  | GTTCCACAGCCCTGTGAACA             | Primer Designer |
|             | NM_004453.3 | Exon 1                        | GCAGCAGAGTTCTTGCTTTCC             | AGATAGCCTGAGAAAGCTGATGAGA        | Primer Designer |
|             | NM_004453.3 | Exon 2                        | CCATAGTTAAGCCTGACATGAGCTA         | ACTCTCCTCCACAAAATGAAAACAA        | Primer Designer |
|             | NM_004453.3 | Exon 3                        | AGTATGTACTGGAACAGAACCTAAGA        | AGATAGAGTTACATGAAAAGGGTTTCC      | Primer Designer |
|             | NM_004453.3 | Exon 4 (AA160 -> 163 missing) | (AAGGAAATGCCAAAAGAAAATTAGGG       | TGCATATTCATACTTACCTTACCTGGAAGA)  | Primer Designer |
|             | NM_004453.3 | Exon 5 (Start -> AA189)       | GCCAATTCTTCCAGGTAAGGTATAG         | TAACCAGGGTATACTTCAACACCAA        | Primer Designer |
|             | NM_004453.3 | Exon 5 (AA171 -> End)         | AGGGCTTCCAATGAATAATCATGGC         | TCCAGAGTAAAGATAGGGAGGAAGA        | Primer Designer |
|             | NM_004453.3 | Exon 6                        | AGAAGATGTTACCTTCTAAGAAACC         | ATGTACAGTTTGTAGCAAGACCTTT        | Primer Designer |
|             | NM_004453.3 | Exon 7                        | TGCACTGTCTCTTCTACATCTGA           | TCAAGATTCACCTCAAGCAACACT         | Primer Designer |
|             | NM_004453.3 | Exon 8                        | GTGACATAAAAAACATTTTAAATACTGCAGGAC | ACTGATGGTAATATAACTCTAGCAGCAGA    | Primer Designer |
|             | NM_004453.3 | Exon 9 (Start -> 359)         | TTGAGTTCAGAGCACAAAGGATTTT         | TGAGAGCTCTGGCTCCGTATGC           | Primer Designer |
|             | NM_004453.3 | Exon 9 (AA341 -> End)         | ATCCATACCTGAGTCCATTTAGAGAGTT      | GACACAGTTTTATAAACTCTACATACTTTTCC | Primer Designer |
|             | NM_004453.3 | Exon 10                       | GCCTTTCCCTACAGCTCTAGAATAC         | T                                | Primer Designer |
| HCS (HLCS)  | NM_004453.3 | Exon 11                       | AAACTTCACTCATCAGCTATCAAAGT        | GCTACCACTGGTACTTTTCTACTTTT       | Primer Designer |
|             | NM_004453.3 | Exon 12                       | GGCTAGTCATATTTCTTTGGTGTGA         | CTGAACTAGGCTTAACAAAACCAGTA       | Primer Designer |
|             | NM_004453.3 | Exon 13                       | CTCTATGGGTAAGCATTAGAAAAGCAA       | CTTTGGCAAGTCAAATGTAAAGTCCAG      | Primer Designer |
|             | NM_000411.6 | Exon 4                        | CGAACTCCTGGGCTCCAAGC              | TGTTGTCAGGTAGAGATGAGAATGCTG      | Variant_Seqr    |
|             | NM_000411.6 | Exon 5 (Start -> 157)         | GATGTTGGGTGCCTTTCCCG              | TGCCAGAGGCTGTCCTGGAAT            | Variant_Seqr    |
|             | NM_000411.6 | Exon 5 (AA60 -> 243)          | GGTGAAGGATGAAGACAGGCC             | GCCTGAGCAGGACGGTATGGA            | Variant_Seqr    |
|             | NM_000411.6 | Exon 5 (AA194 -> End)         | AAACAGCCCGCAGCACACG               | GGCCGACTGTGTGGACATTGA            | Variant_Seqr    |
|             | NM_000411.6 | Exon 6                        | TGAAGATGATTTCCAAACCCGAA           | TGGGTGTGATGTGCTCACTTGG           | Variant_Seqr    |



|                  |             |                              |                            |                            |                 |
|------------------|-------------|------------------------------|----------------------------|----------------------------|-----------------|
| HMG<br>(HMGCL)   |             | Exon 6 (Start -> AA379)      | GTGAGTGCCTCAGTTTAC         | GAGGAGTTAAGGCAGGAAC        | Variant_Seqr    |
|                  | NM_000411.6 | Exon 7                       | GCACAACCACCTTCCATTCCC      | TGCCAAATTACGACCATCTCATTTT  | Variant_Seqr    |
|                  | NM_000411.6 | Exon 7 (Start -> AA475)      | AGGAGACGCATCGTTGTGGG       | TCTTGGATCCTGGTTTCTGAAGAGC  | Variant_Seqr    |
|                  | NM_000411.6 | Exon 8                       | TCTTCCTCCATTCCAGGCGG       | TCAGGCAGGTACACACGCC        | Variant_Seqr    |
|                  | NM_000411.6 | Exon 9                       | CCGAGAGCACTTTGCTGCCA       | TCAAGGCACAAATGATATGCTCACA  | Variant_Seqr    |
|                  | NM_000411.6 | Exon 10                      | TTTGGTGGTTCCCGTGGTCA       | CCCAAGAGGCACTTCAATATCGG    | Variant_Seqr    |
|                  | NM_000411.6 | Exon 11 (Stop codon missing) | TGAAGATGAGCCAGCACTGACC     | CACGAAATCTGAAATGAGGACAAGGA | Variant_Seqr    |
|                  | NM_000411.6 | Exon 11 (AA620 -> End)       | GACCAGTGCTCGGTCCCTCA       | TGCATCAACGACCTCATCACAGA    | Variant_Seqr    |
|                  | NM_000411.6 | Exon 12                      | CGTAAGTCCAAGCCACAGAGGG     | TCCCTGCAGCGAGCCTCA         | Variant_Seqr    |
|                  | NM_000191.2 | Exon 1                       | ATGAAGAGTTGGAGAGGTCTGAAGT  | GTGGAGCCAGCTTCGGAAGTC      | Primer designer |
|                  | NM_000191.2 | Exon 2                       | CCAAACCTGTTGCCACCACCATTC   | TTCATATTGGTCTCCCTGGGAATTG  | Primer designer |
|                  | NM_000191.2 | Exon 3                       | TCACCTGAGACCTCTCAAAGCCA    | TCTGCCCTTTCAGGCCATCA       | Primer designer |
|                  | NM_000191.2 | Exon 4                       | GTAAGAAAGTTGGCAGATGCCAGCAA | TCTCTGTCTGCTCTTGGTGATGAC   | Primer designer |
|                  | NM_000191.2 | Exon 5                       | GACCACTTGAGTCAGAGTCTAGC    | AAAAGTGCTGAAAGGAGTTCACCT   | Primer designer |
| MSUD<br>(BCKDHA) | NM_000191.2 | Exon 6                       | GGGAGAGGAACCTATGCGCTCA     | CCAGTCCTCTGGCACGTAGTT      | Primer designer |
|                  | NM_000191.2 | Exon 7                       | CACCATTGCCAGCTTGAAC        | CCGAGAAGTGTTCTGCCCAGG      | Primer designer |
|                  | NM_000191.2 | Exon 8                       | GCGTGTGGCCTCACTCAACC       | TCAGGCAACAGACGATTGGGA      | Primer designer |
|                  | NM_000191.2 | Exon 8                       | CATCCACTTTTGTCTCAGCTTCAG   | GTTTGCAAGGCTCATCTCTGTG     | Primer designer |
|                  | NM_000191.2 | Exon 9                       | CACGTCCTCAGGCATTCAACTC     | TGTCAAGGAAAAAGCCTGTTTATCT  | Primer designer |
|                  | NM_000709.3 | Exon 1                       | AGGCAGGCCTTGGCATTGAT       | TGGCAGATCTTCCCTTCGGTG      | Primer Designer |
|                  | NM_000709.3 | Exon 2                       | CAGTTATTGACTTGCCAGCCACTTG  | TGCGGGTGGAGGCACAGATA       | Primer Designer |
|                  | NM_000709.3 | Exon 3                       | CGGCGGAGTTTATAGATAAGTTGGA  | TCAGGTCCATCCTTCTGCCCTAAG   | Primer Designer |
|                  | NM_000709.3 | Exon 4                       | CCTCTGGCAGTTCTAAGCAGTCT    | ACAGACCTGAGCCACTACACTTT    | Primer Designer |
|                  | NM_000709.3 | Exon 5                       | TCAGTCTGAACATCAGTCTTCT     | AACCCAGAATTCCACCCAGAAG     | Primer Designer |
|                  | NM_000709.3 | Exon 6                       | CCGTGGGTGTCATGTGAGTGTGAAT  | ATAAGGAACATGCACGAGGCCAAG   | Primer Designer |
|                  | NM_000709.3 | Exon 7                       | CTCTCTGTCTCTCCCTGCTCG      | GTACGCTGAACTGTCGTCCT       | Primer Designer |
|                  | NM_000709.3 | Exon 8                       | CACTCCTCCTTCCCTAGTTCATC    | CCAGTTTCTGAAATGGGCACCA     | Primer Designer |
|                  | NM_000709.3 | Exon 9                       | TCCATTGTCGAGGTGGGAACA      | TGAATGTGCCCTCACCCAGC       | Primer Designer |
| MSUD<br>(BCKDHB) | NM_000056.4 | Exon 1                       | CAGCTCGTCACGTCGCCTT        | GCAAGGAGGTTCCAGAGAGTCAG    | Primer Designer |
|                  | NM_000056.4 | Exon 2                       | ATTAACAAGCTTCTCCAGGTCTGT   | AATATCAGGACCACACACTGTA     | Primer Designer |
|                  | NM_000056.4 | Exon 3 Start -> AA106)       | ACAGACCCTCACAACAAAAGAATCA  | TTTGTCTCGCAAGCCAACAG       | Primer Designer |

|            |             |                            |                                |                                 |                 |
|------------|-------------|----------------------------|--------------------------------|---------------------------------|-----------------|
| MSUD (DBT) | NM_000056.4 | Exon 3 (From AA104 -> End) | GAAGATGTTGCCTTTGGTGGAG         | CATTTGAGAAAATATAGGCCAAAGGATTCTG | Primer Designer |
|            | NM_000056.4 | Exon 4                     | TCCTCTACCTGTTCTATACTTCTCCAT    | CCCAATCCCAATCTATCTGCTTAAA       | Primer Designer |
|            | NM_000056.4 | Exon 5                     | GAAAGACTTATTGTGCTATGGGAAAGA    | AACTGCTAACCTCCCCTTCTTAAAT       | Primer Designer |
|            | NM_000056.4 | Exon 6                     | AGTTAACAGAACATGGTAGACATCTGA    | CCAAACATAAAATTTACACCTGAGGAC     | Primer Designer |
|            | NM_000056.4 | Exon 7                     | GCAGTAATGTCATGGAGCCATAT        | TAGCATCAGTAGCACCAGACTTAAT       | Primer Designer |
|            | NM_000056.4 | Exon 8                     | ATTCTCCATGCAGATCAGTTCCT        | CAATTCAACCCAAGGTGACTGCAT        | Primer Designer |
|            | NM_000056.4 | Exon 9                     | TTTCTTTTCTACTGGGATTACAAACCA    | TAACAAACAGAAAGTGTGGTCAGAA       | Primer Designer |
|            | NM_000056.4 | Exon 10                    | ATCCCAGTTTGGCTTAGACAATAGA      | AGCACATTATTTTCTTCTGAAAGTTGC     | Primer Designer |
|            | NM_001918.3 | Exon 1                     | AGAAAGTAAACACCACTCCTGGAT       | TCAGGTCCTACTGCAACATAACTTT       | Primer designer |
|            | NM_001918.3 | Exon 2                     | CCGGCTAGAAATACAGAGTCAAC        | AGTTTTAGTTCAGGAAGTCCAATGAC      | Primer designer |
| MMA (MMUT) | NM_001918.3 | Exon 3                     | ACGTTTCTCAATTTAAATGGATTCCCA    | AGCTGGGTCTCTCTTTGTATATCTT       | Primer designer |
|            | NM_001918.3 | Exon 4                     | TCTATTTTGTGTTGAACTTGCTACCT     | AACATTGCTTAGTACACCATCTGAAA      | Primer designer |
|            | NM_001918.3 | Exon 5                     | ACAACCTTCTCATTTCTCCCATGTATT    | GAGTGACATATCCACCAGGTACTA        | Primer designer |
|            | NM_001918.3 | Exon 6                     | TGAACTTTCCCTTCAGTAAGACTTG      | ACCTGATGGTTACCACATGCATAT        | Primer designer |
|            | NM_001918.3 | Exon 7                     | CAAGCCTTGTTTGAAATGAATGAATCT    | GATTAACCTCCAGAAGAGTGGCTTT       | Primer designer |
|            | NM_001918.3 | Exon 7 (AA278-> End)       | CATATTGCATGTTGGCAAAGCAA        | CAGCCCTGAAGATACCTCATTTTGG       | Primer designer |
|            | NM_001918.3 | Exon 8                     | GAGGGTAAGTAGAGTGGGTAACAT       | GCCTGAAGGTAACATTGGCAGTAA        | Primer designer |
|            | NM_001918.3 | Exon 9 and 10              | TTCATTGTGTTTAGTCCCTGAATTTGC    | TGGCAGTGAAGGTTGATCCTTTCTT       | Primer designer |
|            | NM_001918.3 | Exon 11                    | TCTTGCCAGTTTCAAGCCATTGAC       | GGGTTTGCCTGATCTTACACCATTG       | Primer designer |
|            | NM_001918.3 | Exon 11 (UTR)              | ACTGTCTGTATATGGCTACCTGTC       | CGTATGATTAAGGATCTAAGGCACAA      | Primer designer |
|            | NM_000255.4 | Exon 2 (Start -> AA41)     | CTTTTTAGCCAGGGCAGCCCATTCT      | CCATGAGGAGTGTGACATAGTCA         | Primer designer |
|            | NM_000255.4 | Exon 2 (AA25 -> End)       | CACTTATCTTTTTGACCACAGAAGTT     | TGAGGCAGGTAAAAGAATCATCAG        | Primer designer |
|            | NM_000255.4 | Exon 3 (Start -> AA181)    | CCATTCATAGTCATGGAACTGACA       | TTGCCATATATGAACAGCCAGATC        | Primer designer |
|            | NM_000255.4 | Exon 3 (AA155 -> End)      | TCTGTTGCCAGATTCCTGCAAGTA       | GATTCAGACAACCTCGAGTTCGT         | Primer designer |
|            | NM_000255.4 | Exon 4                     | TTGGCTTTTTCTCTCATTATCACTCA     | AAGTAGGTACAGTCCTGATGATGGT       | Primer designer |
|            | NM_000255.4 | Exon 5                     | GCTTCTTAATTCTATTTCTGCTTGTC     | AGGGCATAGGAAGAGATTCTTTTCAT      | Primer designer |
|            | NM_000255.4 | Exon 6 (Start -> AA389)    | TGGCAAACCCAAAGCTTCATCA         | CCAATGACTTGCCCAAATCACAA         | Primer designer |
|            | NM_000255.4 | Exon 6 (AA393 -> End)      | TGTAAATTCTGAAAACAAAGTTGCAAAGTG | AGTCTTTGCACACAAATTCTTTTGATGAA   | Primer designer |
|            | NM_000255.4 | Exon 7                     | TGTGTGCATCCATGTATGTGAAAAT      | ATTTTCTCCCAAGACTTAAGAGGTTT      | Primer designer |

|                             |             |                                     |                                     |                                         |                 |
|-----------------------------|-------------|-------------------------------------|-------------------------------------|-----------------------------------------|-----------------|
| MMAB<br>(MMAB)<br>PA (PCCB) | NM_000255.4 | Exon 8                              | AGTTTCACAGAGGTAGATATCATGGT          | CCCTTCTCAGATTGGGATTTGC                  | Primer designer |
|                             | NM_000255.4 | Exon 9                              | GCCATTATTTTCTTTTGGGCTCACA           | GGTCAGCACTATTATTGCCCTTCAT               | Primer designer |
|                             | NM_000255.4 | Exon 10                             | GTTGTATGTAAGGAAATTAAGCTCCCA         | AGCAACCTTCAGGTACTTGCTA                  | Primer designer |
|                             | NM_000255.4 | Exon 11                             | AGTAAATACTTTTGAAATCCCCCAA           | ATGGCTTTAATGGAGCTCTCAATG                | Primer designer |
|                             | NM_000255.4 | Exon 12                             | GATTCCCATCACAGTACTAGAAAAATAGAGATAAA | CCAGGGTTTTTATAGTCATTATCTAGTAATA<br>AACA | Primer designer |
|                             | NM_000255.4 | Exon 13                             | GCTTTCAGGAAAGTACAAATCAGGTA          | ATGGCTTAAGGCTCAGAAGTTCTC                | Primer designer |
|                             | NM_052845.3 | Exon 4                              | TGAAGAAATGGAGCTCACAGAGGG            | TGCGGGTCAGAGCTCAGGAT                    | Primer designer |
|                             | NM_052845.3 | Exon 7                              | TCAGAGATGGCCCTGCTGTACC              | GCAGGTTCACTGACAGACACACAT                | Primer designer |
|                             | NM_00117801 | Exon 1                              | CTTACTCCCAAGCAGGTTCTGTAG            | ACAGGTGCTTCTGCTGGTTATAC                 | Primer designer |
|                             | 4.1         |                                     |                                     |                                         |                 |
|                             | NM_00117801 | Exon 2                              | CCTTCAAGCCCTCCCATGAACA              | TGCTTACATGAAGGAGGACGTATAA               | Primer designer |
|                             | 4.1         |                                     |                                     |                                         |                 |
|                             | NM_00117801 | Exon 3                              | TCATTGAGGCATAGTGGCCAAACTC           | CACCCACTGCACTCTCTTAGT                   | Primer designer |
|                             | 4.1         |                                     |                                     |                                         |                 |
|                             | NM_00117801 | Exon 4                              | AGCCCTTTACATCTGAACATAATGAAG         | TTGCAGTTCTGAAGGAAAACCTATC               | Primer designer |
|                             | 4.1         |                                     |                                     |                                         |                 |
|                             | NM_00117801 | Exon 5                              | TCTATTTCTTCTCCCACTGGGTTT            | GGAGGGTTCAAGGCTTTGCCA                   | Primer designer |
|                             | 4.1         |                                     |                                     |                                         |                 |
|                             | NM_00117801 | Exon 6                              | AACACTGTGGTATTTTGTGAATGTCTG         | TTCATATTTCTCTCCCTTGCTTTC                | Primer designer |
|                             | 4.1         |                                     |                                     |                                         |                 |
|                             | NM_00117801 | Exon 7                              | TTAGGTCTGTTGCCTCCTGTATAGA           | ACAGTCATCTATCTGGTCAAAGGA                | Primer designer |
|                             | 4.1         |                                     |                                     |                                         |                 |
|                             | NM_00117801 | Exon 8                              | TCCTCATTCAGCCACGTCACTA              | ACCATTCCAGCAACTAGCTCTAAA                | Primer designer |
|                             | 4.1         |                                     |                                     |                                         |                 |
|                             | NM_00117801 | Exon 9                              | GTCTGCTACTGACATGCCCTAGA             | AGGCCAGACCAAAAAAACTTGAAT                | Primer designer |
|                             | 4.1         |                                     |                                     |                                         |                 |
|                             | NM_00117801 | Exon 10                             | ACGTGTCACCCCATTTCTTTCC              | TCTGGCCTCACTCTAGACTCTGT                 | Primer designer |
|                             | 4.1         |                                     |                                     |                                         |                 |
|                             | NM_00117801 | Exon 11                             | AACAAACTTCATTGGTGTGTCCAT            | ACAACCATTTAGATTTTTCTCTGGT               | Primer designer |
|                             | 4.1         |                                     |                                     |                                         |                 |
|                             | NM_00117801 | Exon 12 (Missing<br>AA434 -> AA453) | CTTTGGATGGCTGCTGAGGACAA             | TGCCTCAGCAATGCGTAGAGAA                  | Primer designer |
|                             | 4.1         |                                     |                                     |                                         |                 |
|                             | NM_00117801 | Exon 13                             | GGAAAGACCTCACAGCTGAGAGT             | TGAAAGACCCAGGAAACCAGGTAA                | Primer designer |
|                             | 4.1         |                                     |                                     |                                         |                 |
|                             | NM_00117801 | Exon 14                             | TTGTCCCAATTTTACCTGGTTTCCT           | CAACCCTTTGCCCCCTTACTT                   | Primer designer |
|                             | 4.1         |                                     |                                     |                                         |                 |

|                    |         |                          |                            |                 |
|--------------------|---------|--------------------------|----------------------------|-----------------|
| NM_00117801<br>4.1 | Exon 15 | TATGGCCTTTAGAGATGGCACTT  | TGGCAATGTTGTTTAAATTGTGGTT  | Primer designer |
| NM_00117801<br>4.1 | Exon 16 | ATCAGGTTGGGCACTGCTTATACT | AGCTCTAGATGATAACACTGTGTACT | Primer designer |

Abbreviations: GA2: Glutaric aciduria type 2, HCS: Holocarboxylase synthetase deficiency, HMG: 3-hydroxy-3-methyl-glutaryl-CoA-lyase deficiency, MSUD: Maple syrup urine disease, MMA: Methylmalonic academia, PA: Propionic acidaemia. AA: amino acid

All primer sequences are designed to include the canonical splice sites. For most amplicons a minimum of +/- 5 base pairs from exon start/stop are covered. In some instances, primer design with these parameters could not be accomplish this due to difficult areas in the intronic areas 5' and/or 3' of the exons, which in the worst cases resulted in some amino acids being omitted (listed in the table as missing AA's).
